# Supplementary material for: Crystal structure, ferroelectricity and polar order in a Ba4R2Zr4Nb6O30 (R = La, Nd, Sm) tetragonal tungsten bronze new system
Source: Royal Society of Chemistry journal article supplement (doi:10.1039/c7tc00277g), 2017-01-01
Supplement: c7tc00277g1.pdf [file c7tc00277g1.pdf]

## Crystal Structure, Ferroelectricity and Polar Order in $\text{Ba}_4\text{R}_2\text{Zr}_4\text{Nb}_6\text{O}_{30}$ ( $\text{R}=\text{La}, \text{Nd}, \text{Sm}$ ) Tetragonal Tungsten Bronze New System†

Wen Bin Feng, Xiao Li Zhu\*, Xiao Qiang Liu and Xiang Ming Chen\*

### Electronic Supplementary Information:

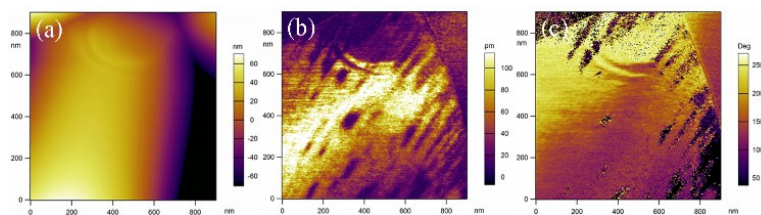

**Fig. S1.** PFM image of stripe like ferroelectric domains in a single grain of  $\text{Ba}_4\text{Nd}_2\text{Zr}_4\text{Nb}_6\text{O}_{30}$ . (a), (b) and (c) are the topography, amplitude and phase images, respectively.

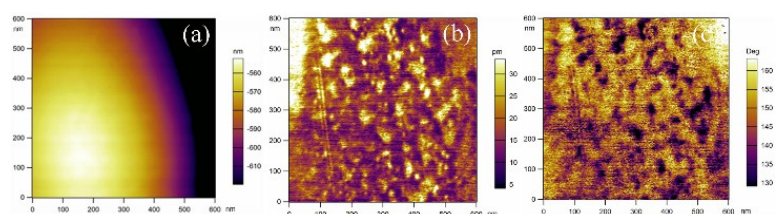

**Fig. S2.** PFM image of disordered local micro polar regions in a single grain of  $\text{Ba}_4\text{Sm}_2\text{Zr}_4\text{Nb}_6\text{O}_{30}$ . (a), (b) and (c) are the topography, amplitude and phase images, respectively.

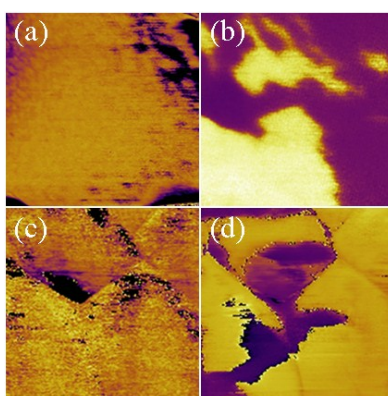

**Fig. S3.** PFM phase images of  $\text{Ba}_4\text{Nd}_2\text{Zr}_4\text{Nb}_6\text{O}_{30}$  and  $\text{Ba}_4\text{Sm}_2\text{Zr}_4\text{Nb}_6\text{O}_{30}$  added with 4V AC voltage in the out-of-plane direction at the observed area for  $\text{Ba}_4\text{Nd}_2\text{Zr}_4\text{Nb}_6\text{O}_{30}$ (a),  $\text{Ba}_4\text{Sm}_2\text{Zr}_4\text{Nb}_6\text{O}_{30}$ (c), and 140V DC voltage in the same direction and area for  $\text{Ba}_4\text{Nd}_2\text{Zr}_4\text{Nb}_6\text{O}_{30}$ (b) and  $\text{Ba}_4\text{Sm}_2\text{Zr}_4\text{Nb}_6\text{O}_{30}$ (d).

**Table S1. Experimental parameters for X-ray diffraction of Ba<sub>4</sub>R<sub>2</sub>Zr<sub>4</sub>Nb<sub>6</sub>O<sub>30</sub> (R=La,Nd,Sm)**

|                     | R=La                    | R=Nd                    | R=Sm                    |
|---------------------|-------------------------|-------------------------|-------------------------|
| Unit cell           | a=b=12.68891(25)Å       | a=b=12.64298(26)Å       | a=b=12.63063(25)Å       |
|                     | c=3.99052(8)Å           | c=3.97619(9)Å           | c=3.97323(8)Å           |
| Crystal system      | Tetragonal              | Tetragonal              | Tetragonal              |
| Z                   | 2                       | 2                       | 2                       |
| Space group         | P4/mbm                  | P4bm                    | P4bm                    |
| Cell volume         | 642.51(4)Å <sup>3</sup> | 635.57(4)Å <sup>3</sup> | 633.86(4)Å <sup>3</sup> |
| $\sqrt{10} c/a$     | 0.9945(0)               | 0.9945(3)               | 0.9947(6)               |
| Reliability factors | R <sub>wp</sub> =6.29   | R <sub>wp</sub> =7.89   | R <sub>wp</sub> =8.38   |
|                     | R <sub>p</sub> =4.82    | R <sub>p</sub> =6.24    | R <sub>p</sub> =6.15    |
|                     | $\chi^2$ =4.882         | $\chi^2$ =6.189         | $\chi^2$ =6.120         |

**Table S2. Final atomic positions of Ba<sub>4</sub>R<sub>2</sub>Zr<sub>4</sub>Nb<sub>6</sub>O<sub>30</sub> (R=La, Nd, Sm).**

| Compositions | Atom    | Wyckoff position | x/a         | y/b         | z/c        | Occupies  |
|--------------|---------|------------------|-------------|-------------|------------|-----------|
| R=La         | La1     | 2a               | 0.0(0)      | 0.0(0)      | 0.0(0)     | 1.0       |
|              | Ba1     | 4c               | 0.16995(7)  | 0.66995(7)  | 0.0(0)     | 1.0       |
|              | Zr1/Nb1 | 2b               | 0.0(0)      | 0.5(0)      | 0.5(0)     | 0.40/0.60 |
|              | Zr2/Nb2 | 8d               | 0.07539(10) | 0.21347(9)  | 0.5(0)     | 0.40/0.60 |
|              | O1      | 2b               | 0.0(0)      | 0.5(0)      | 0.0(0)     | 1.0       |
|              | O2      | 4c               | 0.2782(6)   | 0.7782(6)   | 0.5(0)     | 1.0       |
|              | O3      | 8d               | 0.0784(9)   | 0.1923(8)   | 0.0(0)     | 1.0       |
|              | O4      | 8d               | 0.3387(5)   | 0.0012(6)   | 0.5(0)     | 1.0       |
|              | O5      | 8d               | 0.1320(8)   | 0.0557(9)   | 0.5(0)     | 1.0       |
| R=Nd         | Nd1     | 2a               | 0.0(0)      | 0.0(0)      | 0.8621(24) | 1.0       |
|              | Ba1     | 4c               | 0.16986(9)  | 0.66987(9)  | 0.8621(22) | 1.0       |
|              | Zr1/Nb1 | 2b               | 0.0(0)      | 0.5(0)      | 0.3864(26) | 0.40/0.60 |
|              | Zr2/Nb2 | 8d               | 0.07480(11) | 0.21207(10) | 0.35131(5) | 0.40/0.60 |
|              | O1      | 2b               | 0.0(0)      | 0.5(0)      | 0.901(12)  | 1.0       |
|              | O2      | 4c               | 0.2818(6)   | 0.7818(6)   | 0.311(5)   | 1.0       |
|              | O3      | 8d               | 0.0733(12)  | 0.1941(10)  | 0.919(8)   | 1.0       |
|              | O4      | 8d               | 0.3377(7)   | 0.0020(8)   | 0.331(17)  | 1.0       |
|              | O5      | 8d               | 0.1339(10)  | 0.0567(12)  | 0.469(5)   | 1.0       |
| R=Sm         | Sm1     | 2a               | 0.0(0)      | 0.0(0)      | 0.8854(23) | 1.0       |
|              | Ba1     | 4c               | 0.16979(9)  | 0.66979(9)  | 0.88718(8) | 1.0       |
|              | Zr1/Nb1 | 2b               | 0.0(0)      | 0.5(0)      | 0.4099(30) | 0.40/0.60 |
|              | Zr2/Nb2 | 8d               | 0.07432(13) | 0.21174(12) | 0.3768(20) | 0.40/0.60 |
|              | O1      | 2b               | 0.0(0)      | 0.5(0)      | 0.898(14)  | 1.0       |
|              | O2      | 4c               | 0.2821(7)   | 0.7821(7)   | 0.337(6)   | 1.0       |
|              | O3      | 8d               | 0.0751(18)  | 0.1831(14)  | 0.983(7)   | 1.0       |
|              | O4      | 8d               | 0.3359(8)   | 0.0004(10)  | 0.363(19)  | 1.0       |
|              | O5      | 8d               | 0.1356(13)  | 0.0543(16)  | 0.507(6)   | 1.0       |

**Table S3. Selected bond distances for Ba<sub>4</sub>R<sub>2</sub>Zr<sub>4</sub>Nb<sub>6</sub>O<sub>30</sub> (R=La, Nd, Sm)**

| Bond distances/Å |              |             |             |
|------------------|--------------|-------------|-------------|
| Compositions     | R=La         | R=Nd        | R=Sm        |
| R1- O(3)         | 2.635(8)×4   | 2.633(12)×4 | 2.530(16)×4 |
| R1-O(5)          | 2.699(6)×8   | 2.414(15)×4 | 2.380(19)×4 |
|                  |              | 3.033(17)×4 | 3.082(22)×4 |
| Ba1 -O(1)        | 3.0497(13)   | 3.0410(30)  | 3.0331(19)  |
| Ba1 -O(2)        | 2.785(7)×2   | 2.967(19)   | 2.967(20)   |
|                  |              | 2.682(18)   | 2.686(19)   |
| Ba1 -O(4)        | 2.929(5)×4   | 3.00(5)×2   | 2.99(5)×2   |
|                  |              | 2.83(5)×2   | 2.85(5)×2   |
| Zr/Nb(1) -O(1)   | 1.99526(4)×2 | 1.93(5)     | 1.94(6)     |
|                  |              | 2.04(5)     | 2.03(6)     |
| Zr/Nb(1)-O(4)    | 2.046(7)×4   | 2.063(12)×4 | 2.081(13)×4 |
| Zr/Nb(2)-O(2)    | 2.031(4)     | 2.022(4)    | 2.026(5)    |
| Zr/Nb(2)-O(3)    | 2.0136(15)×2 | 1.732(30)   | 1.604(24)   |
|                  |              | 2.270(30)   | 2.437(24)   |
| Zr/Nb(2)-O(4)    | 1.863(7)     | 1.864(10)   | 1.831(11)   |
| Zr/Nb(2)-O(5)    | 2.127(12)    | 2.152(16)   | 2.195(23)   |
|                  | 1.958(12)    | 1.990(16)   | 1.957(23)   |

**Table S4. Selected bond angles for Ba<sub>4</sub>R<sub>2</sub>Zr<sub>4</sub>Nb<sub>6</sub>O<sub>30</sub> (R=La, Nd, Sm)**

| Compositions        | Bond angle/° |            |            |
|---------------------|--------------|------------|------------|
|                     | R=La         | R=Nd       | R=Sm       |
| O(1)-Zr/Nb(1)-O(1)  | 180.0        | 180.0      | 180.0      |
| O(1)-Zr/Nb(1)-O(4)  | 90.0×8       | 83.8(20)×4 | 84.8(21)×4 |
|                     |              | 96.2(20)×4 | 95.2(21)×4 |
| O(4)- Zr/Nb(1)-O(4) | 180.0×2      | 168(4)×2   | 170(4)×2   |
|                     | 90.9(4)×2    | 90.7(7)×2  | 89.8(8)×2  |
|                     | 89.1(4)×2    | 88.0(7)×2  | 89.2(8)×2  |
| O(2)- Zr/Nb(2)-O(3) | 92.11(28)×2  | 89.3(7)    | 91.0(9)    |
|                     |              | 97.4(7)    | 98.0(8)    |
| O(2)-Zr/Nb(2)-O(4)  | 97.58(29)    | 95.3(4)    | 94.8(4)    |
| O(2)-Zr/Nb(2)-O(5)  | 94.12(32)    | 95.9(4)    | 95.7(5)    |
|                     | 172.0(4)     | 169.8(8)   | 168.3(9)   |
| O(3)-Zr/Nb(2)-O(3)  | 164.5(6)     | 166.7(8)   | 158.4(11)  |
| O(3)-Zr/Nb(2)-O(4)  | 97.1(4)×2    | 93.6(21)   | 99.6(22)   |
|                     |              | 97.2(22)   | 99.2(24)   |
| O(3)-Zr/Nb(2)-O(5)  | 82.43(33)×2  | 95.7(7)    | 91.3(10)   |
|                     | 86.88(26)×2  | 99.1(7)    | 98.7(10)   |
|                     |              | 72.3(6)    | 68.4(8)    |
|                     |              | 73.2(6)    | 70.7(8)    |
| O(4)-Zr/Nb(2)-O(5)  | 168.3(4)     | 165.5(15)  | 164.7(18)  |
|                     | 90.42(33)    | 89.9(7)    | 90.1(8)    |
| O(5)-Zr/Nb(2)-O(5)  | 77.9(5)      | 77.6(6)    | 77.6(8)    |
